# Supplementary material for: Breast-shape changes during radiation therapy after breast-conserving surgery
Source: PubMed Central journal article supplement — Phys Imaging Radiat Oncol. 2018 May 31;6:71–6. doi: 10.1016/j.phro.2018.05.006 (PMC7807602; doi:10.1016/j.phro.2018.05.006), 2018-05-31
Supplement: mmc1.pdf [file mmc1.pdf]

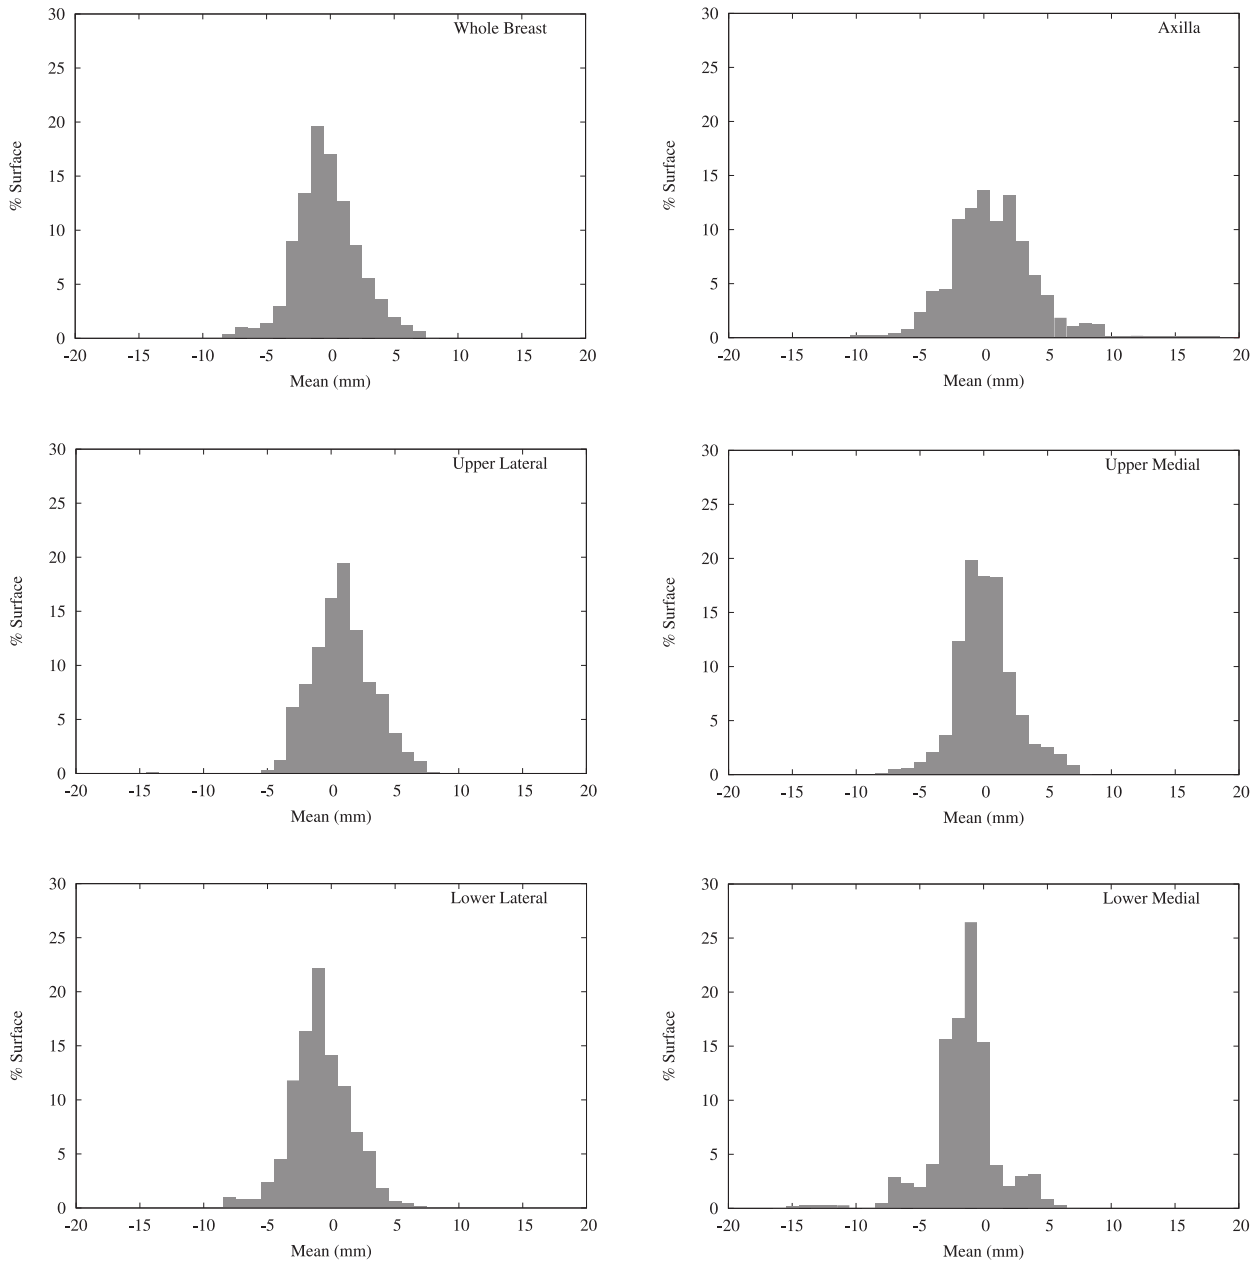

**Supplementary 1.** Histograms of the mean difference between the planning CT scan and follow-up CBCT scans over the course of treatment (i.e., inter-fractional shape changes) for the different ROIs. Each bar indicates the proportion of the surface area in the ROI that exhibits the corresponding uncertainty.
